# Supplementary material
Source: PubMed Central journal article supplement (PMC8547775)
Supplement: mmc1.pdf [file mmc1.pdf]

# Cardiovascular, neurological, and pulmonary events following vaccination with the BNT162b2, ChAdOx1 nCoV-19, and Ad26.COV2.S vaccines: An analysis of European data

Luigi Cari, Mahdiah Naghavi Alhosseini, Paolo Fiore, Sabata Pierno, Sabrina Pacor, Alberta Bergamo, Gianni Sava, Giuseppe Nocentini

## Supplemental Material

- Figure S1.** Frequency of individual cases with specific SAEs and SAE-related deaths among BNT, ChA, and AD26 recipients
- Figure S2.** Percentage of subjects with different ages who were vaccinated with BNT, ChA or AD26
- Figure S3.** Percentage of ChA and AD26 recipients with or without thrombosis-related events who suffered from thrombocytopenia
- Table S1.** Keywords used to download SAEs and deaths related to venous thrombosis
- Table S2.** Keywords used to download SAEs and deaths related to hemorrhage
- Table S3.** Keywords used to download SAEs and deaths related to thrombocytopenia
- Table S4.** Keywords used to download SAEs and deaths related to arterial events
- Table S5.** Keywords used to download SAEs and deaths related to cardiac events
- Table S6.** Keywords used to download SAEs and deaths related to nervous system events
- Table S7.** Percentage of vaccine doses administered in each age range in Europe
- Table S8.** Frequency, the significance of the difference and hazard ratio (HR) of individual cases with specific SAEs among BNT, ChA, and AD26 recipients.
- Table S9.** Frequency, the significance of the difference and hazard ratio (HR) of individual cases with specific SAE-related deaths among BNT, ChA, and AD26 recipients.
- Table S10.** Frequency of individual cases with venous thrombotic SAEs and SAE-related deaths, hemorrhagic SAEs and SAE-related deaths, TTS SAEs and SAE-related deaths and SAEs or death related to thrombocytopenia among ChA and AD26 recipients.
- Table S11.** Frequency of individual cases with cerebral venous thrombosis SAEs and SAE-related deaths, and cerebral venous thrombosis with thrombocytopenia (TTS) SAEs among ChA and AD26 recipients.
- Table S12.** Frequency and hazard ratio (HR) of individual cases with specific SAEs and SAE-related deaths among BNT, ChA, and AD26 recipients.
- Table S13.** Percentage of SAE-related deaths within each SAE in BNT, ChA, and AD26 recipients across age groups

**Figure. S1.** Frequency of individual cases with specific SAEs and SAE-related deaths among BNT, ChA, and AD26 recipients.

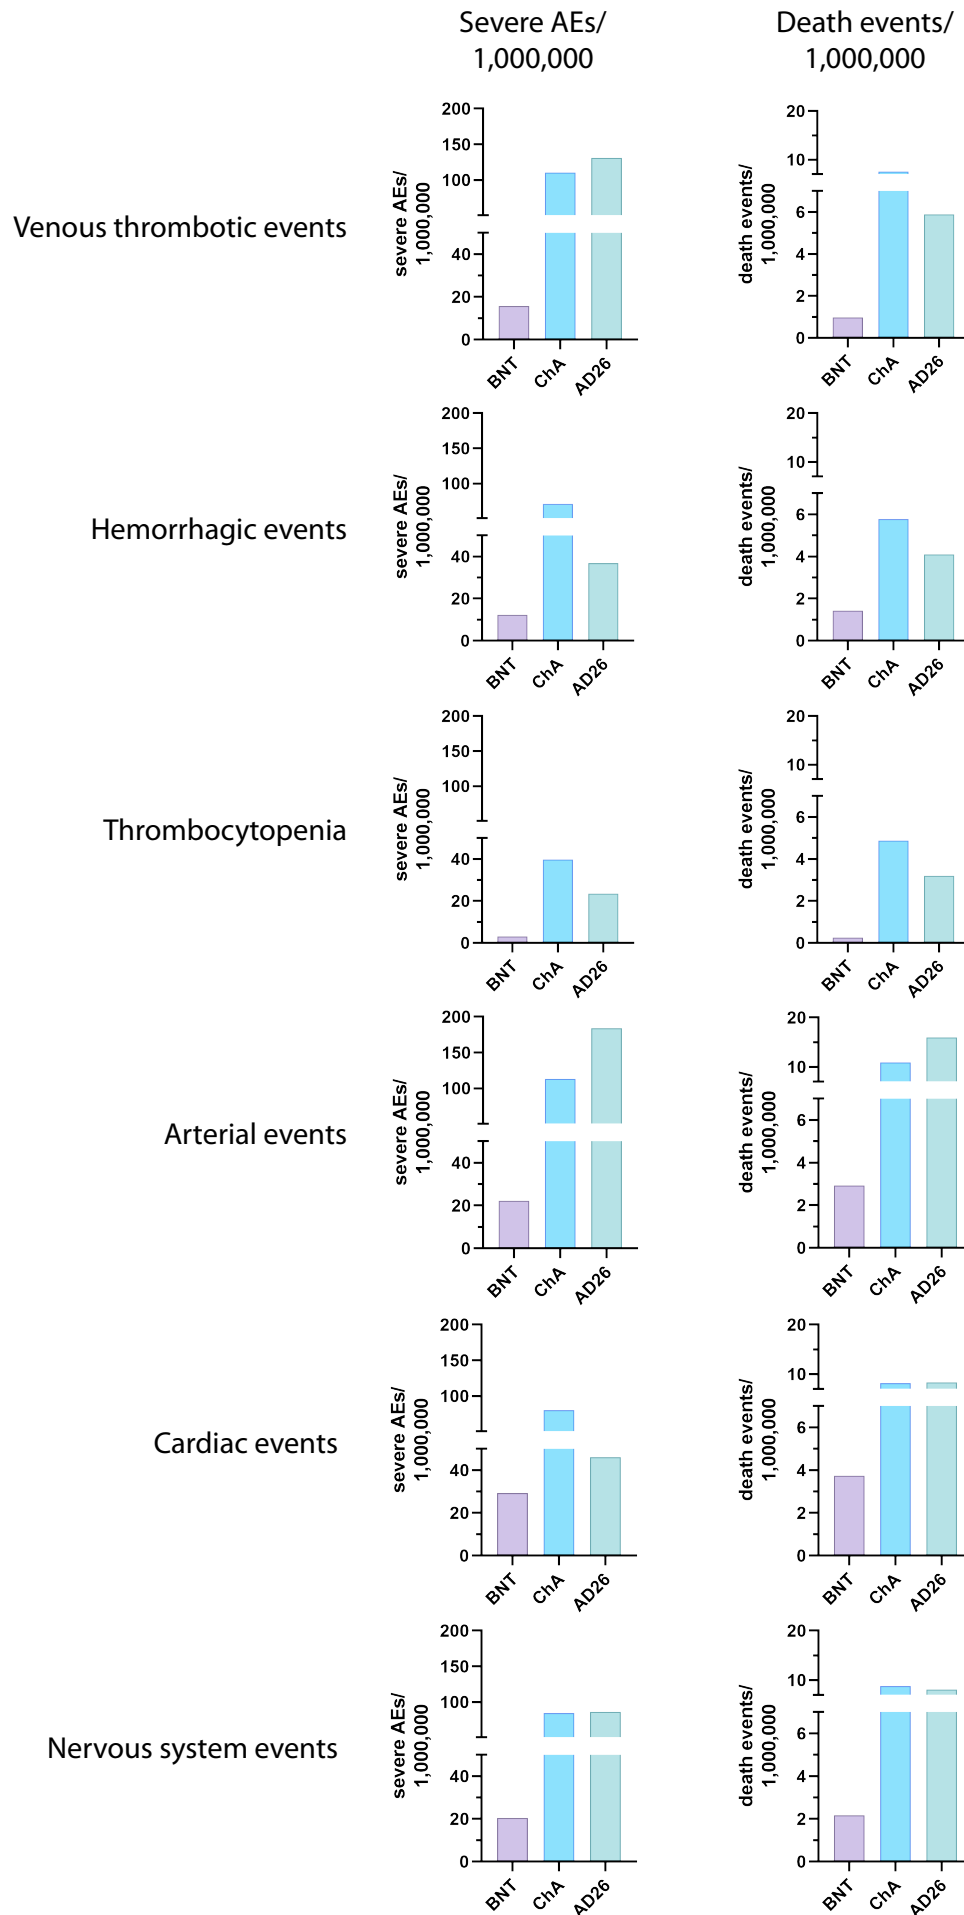

The frequency was obtained by normalizing the number of individual cases with the doses administered in Europe at week 23.

**Figure. S2.** Percentage of subjects with different ages who were vaccinated with BNT, ChA or AD26

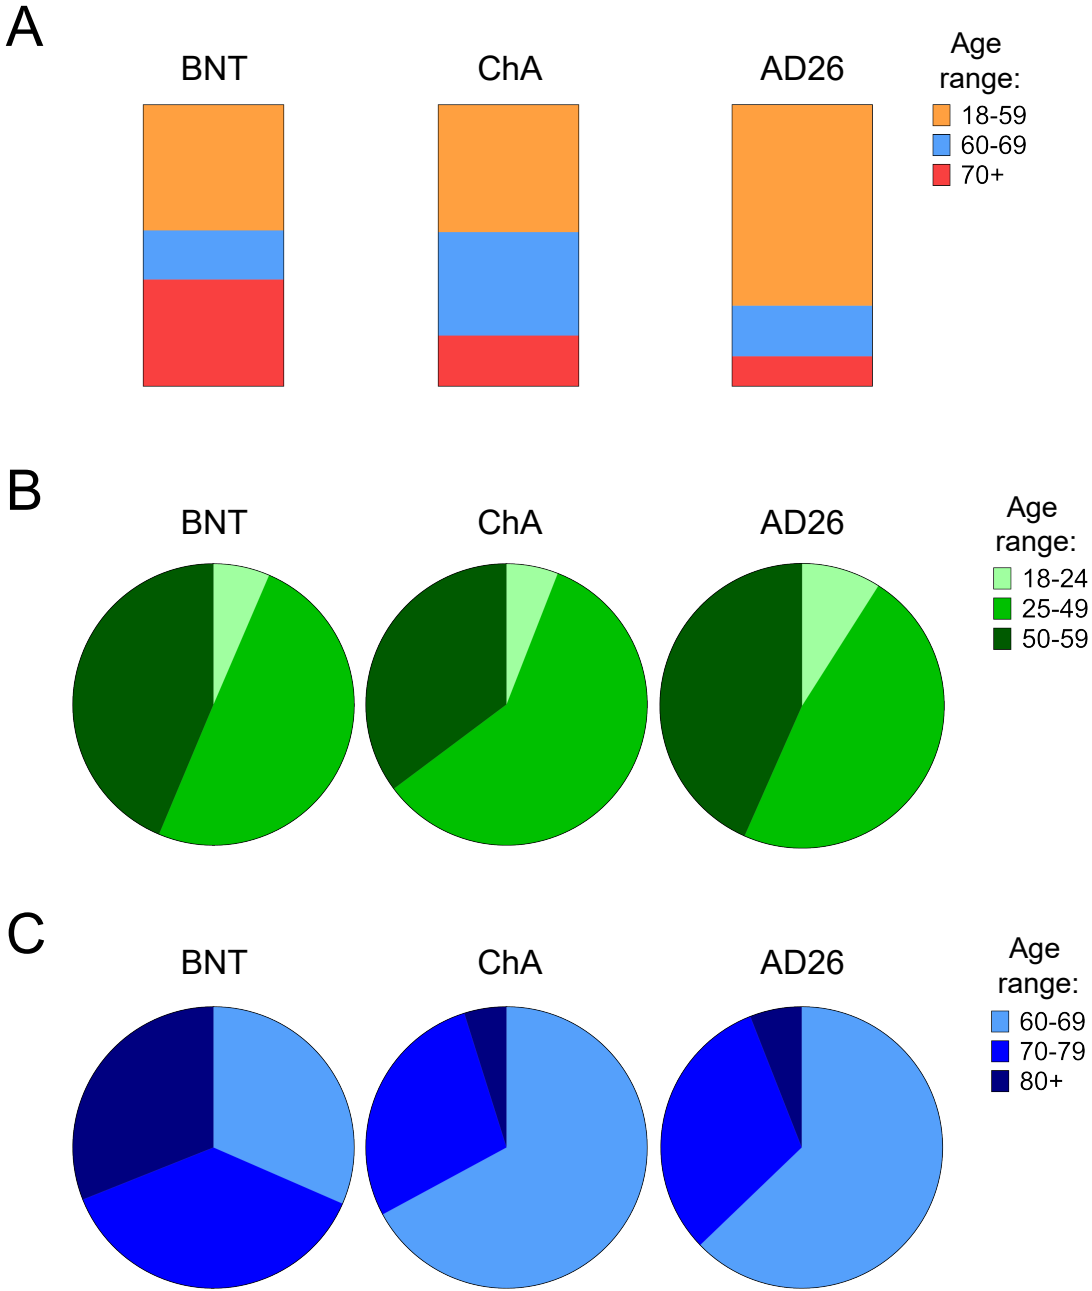

(A) whole population, (B) population aged 18 to 59 years, (C) population aged  $\geq 60$  years

**Figure. S3.** Percentage of ChA and AD26 recipients with or without thrombosis-related events who suffered from thrombocytopenia.

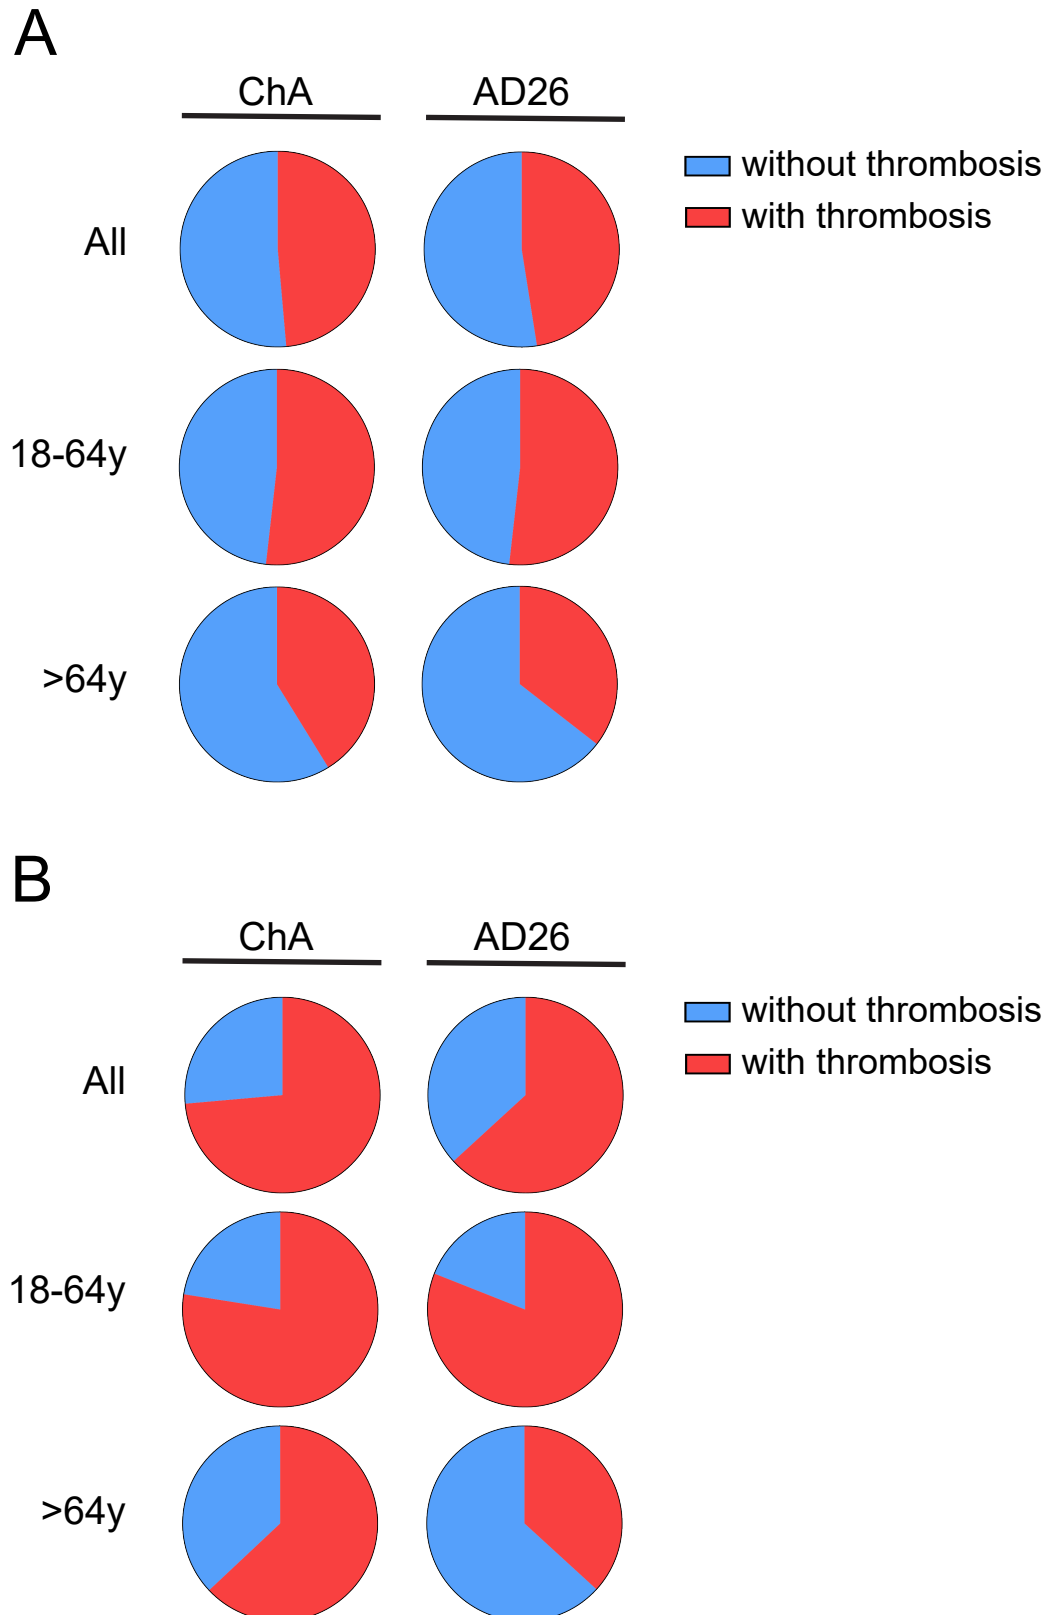

(A) Percentage of ChA and AD26 recipients with or without thrombosis-related SAEs who suffered from thrombocytopenia. (B) Percentage of ChA and AD26 recipients with or without thrombosis-related SAEs who died from thrombocytopenia. The whole population, the population aged 18 to 64 years, and the population aged > 64 years are shown.

**Table S1.** Keywords used to download SAEs and deaths related to venous thrombosis.

| <b>Cerebral venous thrombosis</b>  | <b>Splanchnic vein thrombosis</b>       | <b>Thromboembolic disease</b> | <b>Other venous thrombotic events</b> |
|------------------------------------|-----------------------------------------|-------------------------------|---------------------------------------|
| Cerebral venous sinus thrombosis   | Budd-Chiari syndrome                    | Deep vein thrombosis          | Brachiocephalic vein thrombosis       |
| Cerebral venous thrombosis         | Hepatic vein thrombosis                 | Pulmonary embolism            | Embolism venous                       |
| Superior sagittal sinus thrombosis | Mesenteric vein thrombosis              | Pulmonary microemboli         | Jugular vein occlusion                |
| Transverse sinus thrombosis        | Mesenteric venous occlusion             |                               | Jugular vein thrombosis               |
| Cerebral thrombosis                | Portal vein embolism                    |                               | Ophthalmic vein thrombosis            |
| Cerebral vascular occlusion        | Portal vein occlusion                   |                               | Ovarian vein thrombosis               |
|                                    | Portal vein thrombosis                  |                               | Pelvic venous thrombosis              |
|                                    | Portosplenomesenteric venous thrombosis |                               | Penile vein thrombosis                |
|                                    | Splenic vein occlusion                  |                               | Peripheral vein occlusion             |
|                                    | Splenic vein thrombosis                 |                               | Peripheral vein thrombus extension    |
|                                    | Venocclusive liver disease              |                               | Pulmonary venous thrombosis           |
|                                    | Visceral venous thrombosis              |                               | Renal vein embolism                   |
|                                    | Hepatic vascular thrombosis             |                               | Renal vein occlusion                  |
|                                    | Splenic thrombosis                      |                               | Renal vein thrombosis                 |
|                                    | Thrombosis mesenteric vessel            |                               | Retinal vein occlusion                |
|                                    |                                         |                               | Retinal vein thrombosis               |
|                                    |                                         |                               | Subclavian vein occlusion             |
|                                    |                                         |                               | Subclavian vein stenosis              |
|                                    |                                         |                               | Subclavian vein thrombosis            |
|                                    |                                         |                               | Thrombosed varicose vein              |
|                                    |                                         |                               | Vena cava embolism                    |
|                                    |                                         |                               | Vena cava thrombosis                  |
|                                    |                                         |                               | Venous occlusion                      |
|                                    |                                         |                               | Venous thrombosis                     |
|                                    |                                         |                               | Venous thrombosis limb                |

**Table S2.** Keywords used to download SAEs and deaths related to hemorrhage.

| <b>Nervous system hemorrhage</b>   | <b>Gastrointestinal hemorrhage</b>                  |                                    | <b>Other hemorrhagic events</b> |                                 |                                |
|------------------------------------|-----------------------------------------------------|------------------------------------|---------------------------------|---------------------------------|--------------------------------|
| Basal ganglia haematoma            | Abdominal wall haematoma                            | Oesophageal haemorrhage            | Abnormal uterine bleeding       | Haemorrhagic adrenal infarction | Postmenopausal haemorrhage     |
| Basal ganglia haemorrhage          | Abdominal wall haemorrhage                          | Oesophageal ulcer haemorrhage      | Adrenal haematoma               | Haemorrhagic cyst               | Prostatic haemorrhage          |
| Brain stem haematoma               | Anal fissure haemorrhage                            | Oesophageal varices haemorrhage    | Adrenal haemorrhage             | Haemorrhagic diathesis          | Pulmonary alveolar haemorrhage |
| Brain stem haemorrhage             | Anal haemorrhage                                    | Oral mucosa haematoma              | Adrenal haemorrhage             | Haemorrhagic disorder           | Pulmonary haemorrhage          |
| Cerebellar haematoma               | Diarrhoea haemorrhagic                              | Pancreatic haemorrhage             | Auricular haematoma             | Haemorrhagic thyroid cyst       | Renal cyst haemorrhage         |
| Cerebellar haemorrhage             | Diverticulum intestinal haemorrhagic                | Peptic ulcer haemorrhage           | Breast haematoma                | Haemothorax                     | Renal haemorrhage              |
| Cerebral haematoma                 | Duodenal ulcer haemorrhage                          | Rectal haemorrhage                 | Breast haemorrhage              | Heavy menstrual bleeding        | Respiratory tract haemorrhage  |
| Cerebral haemorrhage               | Gastric haemorrhage                                 | Retroperitoneal haematoma          | Bursal haematoma                | Increased tendency to bruise    | Retinal haemorrhage            |
| Epidural haemorrhage               | Gastric ulcer haemorrhage                           | Retroperitoneal haemorrhage        | Catheter site haemorrhage       | Intermenstrual bleeding         | Scleral haemorrhage            |
| Haemorrhage intracranial           | Gastric varices haemorrhage                         | Small intestinal haemorrhage       | Cervix haemorrhage uterine      | Internal haemorrhage            | Shock haemorrhagic             |
| Haemorrhagic cerebral infarction   | Gastrointestinal haemorrhage                        | Splenic haemorrhage                | Chest wall haematoma            | Intraocular haematoma           | Skin haemorrhage               |
| Haemorrhagic stroke                | Gastrointestinal vascular malformation haemorrhagic | Tongue haematoma                   | Coital bleeding                 | Joint microhaemorrhage          | Soft tissue haemorrhage        |
| Haemorrhagic transformation stroke | Gingival bleeding                                   | Tongue haemorrhage                 | Conjunctival haemorrhage        | Menometrorrhagia                | Spontaneous haematoma          |
| Intracranial haematoma             | Haematemesis                                        | Tonsillar haemorrhage              | Corneal bleeding                | Mucocutaneous haemorrhage       | Spontaneous haemorrhage        |
| Intraventricular haemorrhage       | Haematochezia                                       | Tooth socket haemorrhage           | Ear haemorrhage                 | Mucosal haemorrhage             | Subcutaneous haematoma         |
| Putamen haemorrhage                | Haemoperitoneum                                     | Upper gastrointestinal haemorrhage | Extradural haematoma            | Muscle haemorrhage              | Subretinal haematoma           |
| Spinal cord haematoma              | Haemorrhoidal haemorrhage                           |                                    | Eye haematoma                   | Myocardial haemorrhage          | Ulcer haemorrhage              |
| Spinal cord haemorrhage            | Hepatic haematoma                                   |                                    | Eye haemorrhage                 | Ocular retrobulbar haemorrhage  | Umbilical haematoma            |
| Spinal epidural haematoma          | Hepatic haemorrhage                                 |                                    | Eyelid bleeding                 | Optic disc haemorrhage          | Urethral haemorrhage           |
| Spinal epidural haemorrhage        | Intestinal haemorrhage                              |                                    | Eyelid haematoma                | Orbital haematoma               | Urinary bladder haemorrhage    |
| Spinal subdural haemorrhage        | Intra-abdominal haematoma                           |                                    | Genital haemorrhage             | Ovarian haemorrhage             | Urogenital haemorrhage         |
| Subarachnoid haematoma             | Intra-abdominal haemorrhage                         |                                    | Haemarthrosis                   | Paranasal sinus haemorrhage     | Uterine haemorrhage            |
| Subarachnoid haemorrhage           | Large intestinal haemorrhage                        |                                    | Haematoma muscle                | Pelvic haematoma                | Vaginal haemorrhage            |
| Subdural haematoma                 | Lip haematoma                                       |                                    | Haemospermia                    | Pelvic haemorrhage              | Venous haemorrhage             |
| Subdural haemorrhage               | Lip haemorrhage                                     |                                    | Haematuria                      | Penile haemorrhage              | Vitreous haemorrhage           |
| Thalamus haemorrhage               | Lower gastrointestinal haemorrhage                  |                                    | Haemoptysis                     | Pericardial haemorrhage         | Vulval haematoma               |
|                                    | Melaena                                             |                                    | Haemorrhage subcutaneous        | Periorbital haematoma           | Vulval haemorrhage             |
|                                    | Mesenteric haemorrhage                              |                                    | Haemorrhage subepidermal        | Periorbital haemorrhage         |                                |
|                                    | Mouth haemorrhage                                   |                                    | Haemorrhage urinary tract       | Pharyngeal haemorrhage          |                                |

**Table S3.** Keywords used to download SAEs and deaths related to thrombocytopenia.

| <b>Thrombocytopenia</b>                               |
|-------------------------------------------------------|
| Autoimmune heparin-induced thrombocytopenia           |
| Disseminated intravascular coagulation                |
| Heparin-induced thrombocytopenia                      |
| Immune thrombocytopenia                               |
| Platelet disorder                                     |
| Spontaneous heparin-induced thrombocytopenia syndrome |
| Thrombocytopenia                                      |
| Thrombocytopenic purpura                              |
| Thrombotic microangiopathy                            |
| Thrombotic thrombocytopenic purpura                   |

**Table S4.** Keywords used to download SAEs and deaths related to arterial events.

| <b>Cardiac arterial events (infarction)</b> | <b>Cerebral arterial events</b> |                                         |                                | <b>Other arterial events</b>     |                                     |                                 |
|---------------------------------------------|---------------------------------|-----------------------------------------|--------------------------------|----------------------------------|-------------------------------------|---------------------------------|
| Acute cardiac event                         | Basal ganglia infarction        | Cerebral microembolism                  | Thrombotic cerebral infarction | Adrenal thrombosis               | Mesenteric artery embolism          | Renal vascular thrombosis       |
| Acute coronary syndrome                     | Basal ganglia stroke            | Cerebral microhaemorrhage               | Thrombotic stroke              | Arterial thrombosis              | Mesenteric artery thrombosis        | Retinal artery embolism         |
| Acute coronary syndrome                     | Basilar artery occlusion        | Cerebral microinfarction                | Transient ischaemic attack     | Arteriovenous fistula thrombosis | Mesenteric vascular occlusion       | Retinal artery occlusion        |
| Acute myocardial infarction                 | Basilar artery stenosis         | Cerebral small vessel ischaemic disease | Vertebral artery occlusion     | Catheter site thrombosis         | Microembolism                       | Retinal artery thrombosis       |
| Angina unstable                             | Basilar artery thrombosis       | Cerebral thrombosis                     | Vertebral artery thrombosis    | Device embolisation              | Ocular ischaemic syndrome           | Retinal infarction              |
| Coronary artery disease                     | Brain stem infarction           | Cerebral vascular occlusion             | Vertebrobasilar stroke         | Device related thrombosis        | Ocular vascular disorder            | Retinal ischaemia               |
| Coronary artery embolism                    | Brain stem ischaemia            | Cerebrovascular accident                |                                | Embolism                         | Ophthalmic artery thrombosis        | Retinal vascular disorder       |
| Coronary artery occlusion                   | Brain stem stroke               | Cerebrovascular disorder                |                                | Embolism arterial                | Pancreatic infarction               | Retinal vascular occlusion      |
| Coronary artery thrombosis                  | Brain stem thrombosis           | Embolic cerebellar infarction           |                                | Eye infarction                   | Paradoxical embolism                | Retinal vascular thrombosis     |
| Ischaemic cardiomyopathy                    | Carotid artery occlusion        | Embolic cerebral infarction             |                                | Femoral artery embolism          | Peripheral artery occlusion         | Splenic artery thrombosis       |
| Myocardial infarction                       | Carotid artery thrombosis       | Embolic stroke                          |                                | Haemorrhoids thrombosed          | Peripheral artery thrombosis        | Splenic embolism                |
| Myocardial ischaemia                        | Cerebellar artery occlusion     | Internal capsule infarction             |                                | Hepatic artery embolism          | Peripheral embolism                 | Splenic infarction              |
| Myocardial necrosis                         | Cerebellar artery thrombosis    | Ischaemic cerebral infarction           |                                | Hepatic artery thrombosis        | Prosthetic cardiac valve thrombosis | Splenic thrombosis              |
|                                             | Cerebellar embolism             | Ischaemic stroke                        |                                | Hepatic infarction               | Pulmonary artery occlusion          | Subclavian artery thrombosis    |
|                                             | Cerebellar infarction           | Lacunar infarction                      |                                | Hepatic ischaemia                | Pulmonary artery thrombosis         | Thrombosis                      |
|                                             | Cerebellar ischaemia            | Lacunar stroke                          |                                | Hepatic perfusion disorder       | Pulmonary infarction                | Thrombosis mesenteric vessel    |
|                                             | Cerebellar stroke               | Precerebral artery thrombosis           |                                | Hepatic vascular thrombosis      | Pulmonary thrombosis                | Truncus coeliacus thrombosis    |
|                                             | Cerebral artery embolism        | Spinal artery thrombosis                |                                | Iliac artery embolism            | Pulmonary vascular disorder         | Vascular access site thrombosis |
|                                             | Cerebral artery occlusion       | Spinal cord infarction                  |                                | Iliac artery occlusion           | Renal artery occlusion              | Vascular occlusion              |
|                                             | Cerebral artery stenosis        | Spinal cord ischaemia                   |                                | Inner ear infarction             | Renal artery thrombosis             | Vascular stent occlusion        |
|                                             | Cerebral artery thrombosis      | Spinal stroke                           |                                | Intestinal infarction            | Renal embolism                      | Vascular stent thrombosis       |
|                                             | Cerebral infarction             | Stroke in evolution                     |                                | Intestinal ischaemia             | Renal infarct                       |                                 |
|                                             | Cerebral ischaemia              | Thalamic infarction                     |                                | Mesenteric arterial occlusion    | Renal ischaemia                     |                                 |



**Table S5.** Keywords used to download SAEs and deaths related to cardiac events.

| <b>Cardiac arterial events (infarction)</b> | <b>Cardiac arrhythmias</b>           |                                  | <b>Cardiac inflammations</b> |
|---------------------------------------------|--------------------------------------|----------------------------------|------------------------------|
| Acute cardiac event                         | Arrhythmia                           | Paroxysmal arrhythmia            | Autoimmune myocarditis       |
| Acute coronary syndrome                     | Arrhythmia supraventricular          | Pulseless electrical activity    | Carditis                     |
| Acute coronary syndrome                     | Atrial fibrillation                  | Rhythm idioventricular           | Immune-mediated myocarditis  |
| Acute myocardial infarction                 | Atrial flutter                       | Sinus arrest                     | Myocarditis                  |
| Angina unstable                             | Atrial tachycardia                   | Sinus arrhythmia                 | Pericarditis                 |
| Coronary artery disease                     | Atrioventricular block               | Sinus bradycardia                | Pleuropericarditis           |
| Coronary artery embolism                    | Atrioventricular block complete      | Sinus node dysfunction           |                              |
| Coronary artery occlusion                   | Atrioventricular block first degree  | Sinus tachycardia                |                              |
| Coronary artery thrombosis                  | Atrioventricular block second degree | Supraventricular extrasystoles   |                              |
| Ischaemic cardiomyopathy                    | Bradycardia                          | Supraventricular tachyarrhythmia |                              |
| Myocardial infarction                       | Bradycardia                          | Supraventricular tachycardia     |                              |
| Myocardial ischaemia                        | Bundle branch block                  | Tachyarrhythmia                  |                              |
| Myocardial necrosis                         | Bundle branch block left             | Tachycardia                      |                              |
|                                             | Bundle branch block right            | Tachycardia paroxysmal           |                              |
|                                             | Cardiac arrest                       | Torsade de pointes               |                              |
|                                             | Cardiac fibrillation                 | Trifascicular block              |                              |
|                                             | Cardiac flutter                      | Ventricular arrhythmia           |                              |
|                                             | Cardio-respiratory arrest            | Ventricular extrasystoles        |                              |
|                                             | Defect conduction intraventricular   | Ventricular fibrillation         |                              |
|                                             | Extrasystoles                        | Ventricular flutter              |                              |
|                                             | Long QT syndrome                     | Ventricular tachycardia          |                              |
|                                             | Nodal arrhythmia                     |                                  |                              |
|                                             | Nodal rhythm                         |                                  |                              |

**Table S6.** Keywords used to download SAEs and deaths related to nervous system events.

| Stroke                       |                                         | Venous stroke                      | Nervous system hemorrhage          | Cranial nerves                    |                       |
|------------------------------|-----------------------------------------|------------------------------------|------------------------------------|-----------------------------------|-----------------------|
| Basal ganglia infarction     | Cerebral small vessel ischaemic disease | Cerebral venous sinus thrombosis   | Basal ganglia haematoma            | Acoustic neuritis                 | Trigeminal palsy      |
| Basal ganglia stroke         | Cerebral thrombosis                     | Cerebral venous thrombosis         | Basal ganglia hemorrhage           | Auditory nerve disorder           | Vagus nerve disorder  |
| Basilar artery occlusion     | Cerebral vascular occlusion             | Superior sagittal sinus thrombosis | Brain stem haematoma               | Bell's palsy                      | Vagus nerve paralysis |
| Basilar artery stenosis      | Cerebrovascular accident                | Transverse sinus stenosis          | Brain stem hemorrhage              | Cranial nerve disorder            | Vlth nerve disorder   |
| Basilar artery thrombosis    | Cerebrovascular disorder                | Transverse sinus thrombosis        | Cerebellar haematoma               | Cranial nerve palsies multiple    | Vlth nerve paralysis  |
| Brain stem infarction        | Embolic cerebellar infarction           |                                    | Cerebellar hemorrhage              | Cranial nerve paralysis           | Vlth nerve paresis    |
| Brain stem ischaemia         | Embolic cerebral infarction             |                                    | Cerebral haematoma                 | Facial nerve disorder             |                       |
| Brain stem stroke            | Embolic stroke                          |                                    | Cerebral hemorrhage                | Facial neuralgia                  |                       |
| Brain stem thrombosis        | Internal capsule infarction             |                                    | Epidural hemorrhage                | Glossopharyngeal nerve disorder   |                       |
| Carotid artery occlusion     | Ischaemic cerebral infarction           |                                    | Haemorrhage intracranial           | Hypoglossal nerve paresis         |                       |
| Carotid artery thrombosis    | Ischaemic stroke                        |                                    | Haemorrhagic cerebral infarction   | Illrd nerve disorder              |                       |
| Cerebellar artery occlusion  | Lacunar infarction                      |                                    | Haemorrhagic stroke                | Illrd nerve paralysis             |                       |
| Cerebellar artery thrombosis | Lacunar stroke                          |                                    | Haemorrhagic transformation stroke | Illrd nerve paresis               |                       |
| Cerebellar embolism          | Precerebral artery thrombosis           |                                    | Intracranial haematoma             | IVth nerve disorder               |                       |
| Cerebellar infarction        | Spinal artery thrombosis                |                                    | Intraventricular hemorrhage        | IVth nerve paralysis              |                       |
| Cerebellar ischaemia         | Spinal cord infarction                  |                                    | Putamen haemorrhage                | IVth nerve paresis                |                       |
| Cerebellar stroke            | Spinal cord ischaemia                   |                                    | Spinal cord haematoma              | Microvascular cranial nerve palsy |                       |
| Cerebral artery embolism     | Spinal stroke                           |                                    | Spinal cord hemorrhage             | Neuritis cranial                  |                       |
| Cerebral artery occlusion    | Stroke in evolution                     |                                    | Spinal epidural haematoma          | Olfactory nerve disorder          |                       |
| Cerebral artery stenosis     | Thalamic infarction                     |                                    | Spinal epidural hemorrhage         | Optic ischaemic neuropathy        |                       |
| Cerebral artery thrombosis   | Thrombotic cerebral infarction          |                                    | Spinal subdural hemorrhage         | Optic neuritis                    |                       |
| Cerebral infarction          | Thrombotic stroke                       |                                    | Subarachnoid haematoma             | Paresis cranial nerve             |                       |
| Cerebral ischaemia           | Transient ischaemic attack              |                                    | Subarachnoid hemorrhage            | Trigeminal nerve disorder         |                       |
| Cerebral microembolism       | Vertebral artery occlusion              |                                    | Subdural haematoma                 | Trigeminal nerve paresis          |                       |
| Cerebral microhaemorrhage    | Vertebral artery thrombosis             |                                    | Subdural hemorrhage                | Trigeminal neuralgia              |                       |
| Cerebral microinfarction     | Vertebrobasilar stroke                  |                                    | Thalamus haemorrhage               | Trigeminal neuritis               |                       |

**Table S7.** Percentage of vaccine doses administered in each age range in Europe.

|                                                                | BNT162b2 |        |        | ChAdOx1 nCoV-19 |        |        | Ad26.COV2.S |        |        |
|----------------------------------------------------------------|----------|--------|--------|-----------------|--------|--------|-------------|--------|--------|
|                                                                | <18y     | 18-64y | >64y   | <18y            | 18-64y | >64y   | <18y        | 18-64y | >64y   |
| <b>European countries that provides age groups data (W23)*</b> | 0.278%   | 53.24% | 46.48% | 0.001%          | 63.43% | 36.57% | 0.005%      | 80.41% | 19.59% |

\* The data relating to the 25 of the 30 European countries (those that provided the number of vaccine doses administered to each age group) present in the European database of the European Center for Disease Prevention and Control (ECDC) are reported. The percentage of doses administered to the 18-64 age group was calculated considering the vaccine doses administered to the 18-24, 25-39, 40-49, 50-59 age groups, and half of the doses administered to the 60-69 age group. The percentage of doses administered to the age group > 64 was calculated considering the vaccine doses administered to half of the age group 60-69 and all doses administered to the age groups 70-79 and ≥ 80.

**Table S8.** Frequency, significance of the difference and hazard ratio (HR) of individual cases with specific SAEs among BNT, ChA, and AD26 recipients.

|                                 | 18-64y*                                       |               |              |            |                               |            |                               | >65y*                                         |               |               |            |                            |            |                             |
|---------------------------------|-----------------------------------------------|---------------|--------------|------------|-------------------------------|------------|-------------------------------|-----------------------------------------------|---------------|---------------|------------|----------------------------|------------|-----------------------------|
|                                 | SAEs/<br>1,000,000 administrations<br>mean±SD |               |              | ChA/BNT    |                               | AD26/BNT   |                               | SAEs/<br>1,000,000 administrations<br>mean±SD |               |               | ChA/BNT    |                            | AD26/BNT   |                             |
|                                 | BNT                                           | ChA           | AD26         | p value    | HR<br>mean±SD<br>(95% CI)     | p value    | HR<br>mean±SD<br>(95% CI)     | BNT                                           | ChA           | AD26          | p value    | HR<br>mean±SD<br>(95% CI)  | p value    | HR<br>mean±SD<br>(95% CI)   |
| <b>Venous thrombotic events</b> | 10.0 ± 0.50                                   | 107.4 ± 11.29 | 122.4 ± 6.21 | p < 0.0001 | 10.71 ± 1.02<br>(9.65-11.78)  | p < 0.0001 | 12.23 ± 0.74<br>(11.45-13.01) | 23.6 ± 1.72                                   | 119.2 ± 17.99 | 167.4 ± 53.99 | p = 0.0001 | 5.05 ± 0.65<br>(4.37-5.73) | p = 0.0034 | 7.14 ± 2.32<br>(4.70-9.58)  |
| <b>Hemorrhagic events</b>       | 13.4 ± 0.67                                   | 96.3 ± 10.12  | 35.5 ± 1.80  | p < 0.0001 | 7.21 ± 0.68<br>(6.49-7.93)    | p < 0.0001 | 2.66 ± 0.16<br>(2.49-2.83)    | 11.0 ± 0.80                                   | 32.9 ± 4.96   | 43.4 ± 14.00  | p = 0.0003 | 3.00 ± 0.38<br>(2.60-3.40) | p = 0.0064 | 3.98 ± 1.30<br>(2.62-5.34)  |
| <b>Thrombocytopenia</b>         | 2.4 ± 0.12                                    | 46.5 ± 4.88   | 25.0 ± 1.27  | p < 0.0001 | 19.47 ± 1.85<br>(17.52-21.41) | p < 0.0001 | 10.48 ± 0.64<br>(9.81-11.15)  | 4.0 ± 0.29                                    | 30.9 ± 4.67   | 18.3 ± 5.91   | p < 0.0001 | 7.72 ± 0.98<br>(6.69-8.74) | p = 0.0052 | 4.60 ± 1.50<br>(3.03-6.18)  |
| <b>Arterial events</b>          | 12.7 ± 0.64                                   | 106.8 ± 11.23 | 158.6 ± 8.04 | p < 0.0001 | 8.41 ± 0.80<br>(7.57-9.24)    | p < 0.0001 | 12.50 ± 0.76<br>(11.70-13.29) | 35.2 ± 2.56                                   | 127.5 ± 19.24 | 285.9 ± 92.20 | p = 0.0002 | 3.62 ± 0.46<br>(3.14-4.10) | p = 0.0031 | 8.17 ± 2.66<br>(5.38-10.97) |
| <b>Cardiac events</b>           | 31.7 ± 1.59                                   | 94.9 ± 9.98   | 40.0 ± 2.03  | p < 0.0001 | 2.99 ± 0.28<br>(2.69-3.29)    | p < 0.0001 | 1.26 ± 0.07<br>(1.18-1.34)    | 26.2 ± 1.90                                   | 59.3 ± 8.94   | 62.5 ± 20.14  | p = 0.0008 | 2.27 ± 0.29<br>(1.97-2.57) | p = 0.0186 | 2.40 ± 0.78<br>(1.58-3.22)  |
| <b>Nervous system events</b>    | 14.1 ± 0.71                                   | 83.0 ± 8.73   | 71.8 ± 3.64  | p < 0.0001 | 5.89 ± 0.56<br>(5.30-6.47)    | p < 0.0001 | 5.10 ± 0.31<br>(4.78-5.43)    | 29.2 ± 2.12                                   | 89.3 ± 13.48  | 143.5 ± 46.27 | p = 0.0003 | 3.06 ± 0.39<br>(2.65-3.47) | p = 0.0048 | 4.95 ± 1.61<br>(3.26-6.65)  |

\* The frequency of individual cases with specific AEs divided according to age range (18–64 years and >64 years) was obtained by normalizing the number of individual cases with the doses supposedly administered to each age range in Europe at week 23 (Table S7). To do this, we considered the doses administered by the European countries providing data on the administration of each vaccine to these age ranges and established a method for evaluating the variance of the doses (see the Method section for details).

**Table S9.** Frequency, significance of the difference and hazard ratio (HR) of individual cases with specific SAE-related deaths among BNT, ChA, and AD26 recipients.

|                                 | 18-64y*                                               |            |             |            |                               |            |                               | >65y*                                                 |             |              |            |                            |            |                             |
|---------------------------------|-------------------------------------------------------|------------|-------------|------------|-------------------------------|------------|-------------------------------|-------------------------------------------------------|-------------|--------------|------------|----------------------------|------------|-----------------------------|
|                                 | death events/<br>1,000,000 administrations<br>mean±SD |            |             | ChA/BNT    |                               | AD26/BNT   |                               | death events/<br>1,000,000 administrations<br>mean±SD |             |              | ChA/BNT    |                            | AD26/BNT   |                             |
|                                 | BNT                                                   | ChA        | AD26        | p value    | HR<br>mean±SD<br>(95% CI)     | p value    | HR<br>mean±SD<br>(95% CI)     | BNT                                                   | ChA         | AD26         | p value    | HR<br>mean±SD<br>(95% CI)  | p value    | HR<br>mean±SD<br>(95% CI)   |
| <b>Venous thrombotic events</b> | 0.4 ± 0.02                                            | 7.3 ± 0.77 | 6.1 ± 0.31  | p < 0.0001 | 17.68 ± 1.68<br>(15.91-19.44) | p < 0.0001 | 14.77 ± 0.90<br>(13.83-15.71) | 1.8 ± 0.13                                            | 8.2 ± 1.24  | 5.4 ± 1.74   | p = 0.0001 | 4.62 ± 0.59<br>(4.01-5.24) | p = 0.0102 | 3.06 ± 1.00<br>(2.01-4.11)  |
| <b>Hemorrhagic events</b>       | 0.3 ± 0.02                                            | 6.1 ± 0.64 | 3.6 ± 0.18  | p < 0.0001 | 17.52 ± 1.67<br>(15.77-19.27) | p < 0.0001 | 10.21 ± 0.62<br>(9.55-10.86)  | 2.9 ± 0.21                                            | 5.5 ± 0.83  | 6.2 ± 2.00   | p = 0.0009 | 1.87 ± 0.24<br>(1.62-2.12) | p = 0.0274 | 2.13 ± 0.69<br>(1.40-2.86)  |
| <b>Thrombocytopenia</b>         | 0.1 ± 0.005                                           | 5.9 ± 0.63 | 3.1 ± 0.16  | p < 0.0001 | 63.37 ± 6.02<br>(57.05-69.69) | p < 0.0001 | 32.98 ± 2.00<br>(30.88-35.08) | 0.5 ± 0.03                                            | 3.4 ± 0.51  | 3.8 ± 1.22   | p < 0.0001 | 7.20 ± 0.92<br>(6.23-8.16) | p = 0.0031 | 8.07 ± 2.63<br>(5.31-10.83) |
| <b>Arterial events</b>          | 0.7 ± 0.03                                            | 7.7 ± 0.81 | 10.1 ± 0.51 | p < 0.0001 | 11.49 ± 1.09<br>(10.35-12.63) | p < 0.0001 | 15.09 ± 0.92<br>(14.13-16.05) | 6.1 ± 0.44                                            | 16.3 ± 2.46 | 39.3 ± 12.69 | p = 0.0005 | 2.69 ± 0.34<br>(2.33-3.05) | p = 0.0036 | 6.54 ± 2.13<br>(4.31-8.78)  |
| <b>Cardiac events</b>           | 1.2 ± 0.06                                            | 5.6 ± 0.59 | 5.8 ± 0.29  | p < 0.0001 | 4.67 ± 0.44<br>(4.20-5.13)    | p < 0.0001 | 4.77 ± 0.29<br>(4.47-5.07)    | 7.2 ± 0.52                                            | 12.4 ± 1.87 | 14.1 ± 4.56  | p = 0.0017 | 1.72 ± 0.22<br>(1.49-1.95) | p = 0.0365 | 1.98 ± 0.64<br>(1.30-2.66)  |
| <b>Nervous system events</b>    | 0.4 ± 0.02                                            | 8.3 ± 0.87 | 5.8 ± 0.29  | p < 0.0001 | 19.73 ± 1.87<br>(17.76-21.70) | p < 0.0001 | 13.83 ± 0.84<br>(12.95-14.71) | 4.6 ± 0.33                                            | 9.8 ± 1.48  | 17.6 ± 5.66  | p = 0.0010 | 2.15 ± 0.28<br>(1.86-2.44) | p = 0.0067 | 3.87 ± 1.26<br>(2.55-5.19)  |

\* The frequency of individual cases with specific AEs divided according to age range (18–64 years and >64 years) was obtained by normalizing the number of individual cases with the doses supposedly administered to each age range in Europe at week 23 (Table S7). To do this, we considered the doses administered by the European countries providing data on the administration of each vaccine to these age ranges and established a method for evaluating the variance of the doses (see the Method section for details).

**Table S10.** Frequency of individual cases with venous thrombotic SAEs and SAE-related deaths, hemorrhagic SAEs and SAE-related deaths, TTS SAEs and SAE-related deaths and SAEs or death related to thrombocytopenia among ChA and AD26 recipients.

|                                                                       | SAEs/1,000,000 doses |                  |                   |                   |                   |                 | death events/1,000,000 doses |                  |                  |                  |                  |                  |
|-----------------------------------------------------------------------|----------------------|------------------|-------------------|-------------------|-------------------|-----------------|------------------------------|------------------|------------------|------------------|------------------|------------------|
|                                                                       | ALL                  |                  | 18-64y            |                   | >64y              |                 | ALL                          |                  | 18-64y           |                  | >64y             |                  |
|                                                                       | ChA                  | AD26             | ChA               | AD26              | ChA               | AD26            | ChA                          | AD26             | ChA              | AD26             | ChA              | AD26             |
| <b>Venous thrombotic events</b>                                       | 110.6                | 131.2            | 107.4             | 122.4             | 119.2             | 167.4           | 7.55                         | 5.90             | 7.30             | 6.08             | 8.20             | 5.39             |
| <b>Hemorrhagic events</b>                                             | 70.7                 | 37.0             | 96.3              | 35.5              | 32.9              | 43.4            | 5.78                         | 4.10             | 6.10             | 3.55             | 5.47             | 6.19             |
| <b>Thrombocytopenia</b>                                               | 39.9                 | 23.6             | 46.4              | 25.0              | 30.9              | 18.3            | 4.89                         | 3.20             | 5.95             | 3.08             | 3.40             | 3.79             |
| <b>Venous thrombosis, and/or hemorrhagia, and/or thrombocytopenia</b> | 194.8                | 172.8            | 215.9             | 163.7             | 167.7             | 221.4           | 12.08                        | 9.51             | 11.22            | 9.22             | 13.85            | 11.30            |
| <b>TTS*</b><br><b>(% of TTS within Venous thrombotic events)</b>      | 19.41<br>(17.55%)    | 11.21<br>(8.54%) | 24.08<br>(22.43%) | 12.93<br>(10.56%) | 12.76<br>(10.70%) | 6.51<br>(3.89%) | 3.6<br>(47.68%)              | 2.02<br>(32.24%) | 4.61<br>(63.14%) | 2.49<br>(40.93%) | 2.14<br>(26.11%) | 1.39<br>(25.78%) |

\* Individual cases with thrombosis and thrombocytopenia were considered to suffer of TTS

**Table S11.** Frequency of individual cases with cerebral venous thrombosis SAEs and SAE-related deaths, and cerebral venous thrombosis with thrombocytopenia (TTS) SAEs among ChA and AD26 recipients.

|                                                                       | SAEs/1,000,000 doses |                |                 |                |                |               | death events/1,000,000 doses |                 |                 |                 |                 |                |
|-----------------------------------------------------------------------|----------------------|----------------|-----------------|----------------|----------------|---------------|------------------------------|-----------------|-----------------|-----------------|-----------------|----------------|
|                                                                       | ALL                  |                | 18-64y          |                | >64y           |               | ALL                          |                 | 18-64y          |                 | >64y            |                |
|                                                                       | ChA                  | AD26           | ChA             | AD26           | ChA            | AD26          | ChA                          | AD26            | ChA             | AD26            | ChA             | AD26           |
| <b>Cerebral venous thrombosis</b>                                     | 14.90                | 17.70          | 20.0            | 18.3           | 7.4            | 15.3          | 2.70                         | 2.00            | 3.75            | 2.32            | 1.27            | 0.92           |
| <b>Cerebral venous thrombosis with thrombocytopenia (CVT-TTS) (%)</b> | 7.4<br>(49.4%)       | 7.5<br>(42.3%) | 11.8<br>(59.0%) | 9.7<br>(53.1%) | 2.1<br>(29.0%) | 0.9<br>(5.9%) | 2.09<br>(77.3%)              | 1.33<br>(66.7%) | 3.10<br>(82.7%) | 1.86<br>(80.0%) | 0.79<br>(62.4%) | 0.00<br>(0.0%) |

**Table S12.** Frequency and hazard ratio (HR) of individual cases with specific SAEs and SAE-related deaths among BNT, ChA, and AD26 recipients.

|                                      | SAEs                                 |      |       |         |          | Death events                         |     |      |         |          |
|--------------------------------------|--------------------------------------|------|-------|---------|----------|--------------------------------------|-----|------|---------|----------|
|                                      | events/<br>1,000,000 administrations |      |       | HR      |          | events/<br>1,000,000 administrations |     |      | HR      |          |
|                                      | BNT                                  | ChA  | AD26  | ChA/BNT | AD26/BNT | BNT                                  | ChA | AD26 | ChA/BNT | AD26/BNT |
| Cerebral venous thrombosis           | 1.1                                  | 14.9 | 17.7  | 13.31   | 15.80    | 0.1                                  | 2.7 | 2.0  | 26.59   | 19.72    |
| Splanchnic vein thrombosis           | 0.4                                  | 4.8  | 4.1   | 11.50   | 9.75     | 0.1                                  | 0.8 | 0.3  | 14.40   | 6.03     |
| Thromboembolic disease               | 12.7                                 | 84.4 | 105.7 | 6.62    | 8.30     | 0.8                                  | 4.5 | 3.9  | 5.42    | 4.75     |
| Other venous thrombotic events       | 1.8                                  | 12.0 | 11.7  | 6.77    | 6.58     | 0.0                                  | 0.5 | 0.8  | 23.04   | 36.16    |
| Nervous system hemorrhage            | 2.5                                  | 13.0 | 11.9  | 5.22    | 4.76     | 1.0                                  | 4.6 | 3.2  | 4.60    | 3.21     |
| Gastrointestinal hemorrhage          | 2.9                                  | 12.7 | 9.2   | 4.31    | 3.12     | 0.3                                  | 0.7 | 0.7  | 2.49    | 2.26     |
| Other hemorrhagic events             | 7.1                                  | 46.2 | 17.3  | 6.50    | 2.44     | 0.2                                  | 0.6 | 0.3  | 3.45    | 2.01     |
| Thrombocytopenia                     | 3.1                                  | 39.9 | 23.6  | 12.86   | 7.60     | 0.3                                  | 4.9 | 3.2  | 18.93   | 12.49    |
| Cardiac arterial events (infarction) | 4.4                                  | 16.8 | 21.7  | 3.79    | 4.91     | 1.3                                  | 4.0 | 4.8  | 2.95    | 3.55     |
| Cerebral arterial events             | 12.2                                 | 53.8 | 65.3  | 4.40    | 5.34     | 1.2                                  | 4.3 | 4.9  | 3.52    | 4.00     |
| Other arterial events                | 6.3                                  | 47.4 | 110.3 | 7.51    | 17.49    | 0.5                                  | 3.6 | 8.0  | 7.16    | 15.88    |
| Cardiac arterial events (infarction) | 4.4                                  | 16.8 | 21.7  | 3.79    | 4.91     | 1.3                                  | 4.0 | 4.8  | 2.95    | 3.55     |
| Cardiac arrhythmias                  | 22.2                                 | 60.7 | 24.4  | 2.73    | 1.10     | 2.6                                  | 4.8 | 4.6  | 1.85    | 1.77     |
| Cardiac inflammations                | 3.5                                  | 4.3  | 3.2   | 1.22    | 0.91     | 0.1                                  | 0.1 | 0.0  | 2.05    | 0.00     |
| Stroke                               | 12.2                                 | 53.8 | 65.3  | 4.40    | 5.34     | 1.2                                  | 4.3 | 4.9  | 3.52    | 4.00     |
| Venous stroke                        | 0.7                                  | 11.7 | 11.9  | 17.54   | 17.82    | 0.1                                  | 2.0 | 1.4  | 39.48   | 26.30    |
| Nervous system hemorrhage            | 2.5                                  | 13.0 | 11.9  | 5.22    | 4.76     | 1.0                                  | 4.6 | 3.2  | 4.60    | 3.21     |
| Cranial nerves                       | 5.6                                  | 12.6 | 5.4   | 2.25    | 0.97     | 0.0                                  | 0.0 | 0.0  | N.A.*   | N.A.*    |

\* Not applicable, no death events reported for both vaccines



**Table S13.** Percentage of SAE-related deaths within each SAE in BNT, ChA, and AD26 recipients across age groups.

|                                             | % of death events within SAEs |       |       |       |       |       |
|---------------------------------------------|-------------------------------|-------|-------|-------|-------|-------|
|                                             | 18-64y                        |       |       | >64y  |       |       |
|                                             | BNT                           | ChA   | AD26  | BNT   | ChA   | AD26  |
| <b>Cerebral venous thrombosis</b>           | 7.5%                          | 18.8% | 12.7% | 11.8% | 17.2% | 6.0%  |
| <b>Splanchnic vein thrombosis</b>           | 14.3%                         | 17.5% | 11.5% | 14.0% | 14.6% | 0.0%  |
| <b>Thromboembolic disease</b>               | 3.8%                          | 4.0%  | 4.1%  | 7.7%  | 6.8%  | 2.5%  |
| <b>Other venous thrombotic events</b>       | 0.0%                          | 6.3%  | 4.4%  | 2.5%  | 1.5%  | 20.2% |
| <b>Nervous system hemorrhage</b>            | 20.3%                         | 36.1% | 28.6% | 48.7% | 34.1% | 24.1% |
| <b>Gastrointestinal hemorrhage</b>          | 2.9%                          | 3.6%  | 4.6%  | 19.5% | 12.9% | 19.2% |
| <b>Other hemorrhagic events</b>             | 0.2%                          | 0.7%  | 2.5%  | 10.0% | 5.4%  | 0.0%  |
| <b>Thrombocytopenia</b>                     | 3.8%                          | 12.8% | 12.4% | 11.7% | 11.0% | 20.7% |
| <b>Cardiac arterial events (infarction)</b> | 16.1%                         | 17.7% | 18.8% | 37.2% | 30.7% | 27.0% |
| <b>Cerebral arterial events</b>             | 2.5%                          | 6.5%  | 5.7%  | 12.7% | 9.6%  | 10.4% |
| <b>Other arterial events</b>                | 2.5%                          | 5.3%  | 4.6%  | 12.8% | 11.6% | 14.6% |
| <b>Cardiac arterial events (infarction)</b> | 16.1%                         | 17.7% | 18.8% | 37.2% | 30.7% | 27.0% |
| <b>Cardiac arrhythmias</b>                  | 3.5%                          | 4.4%  | 14.4% | 26.8% | 18.2% | 27.9% |
| <b>Cardiac inflammations</b>                | 0.9%                          | 2.5%  | 0.0%  | 5.1%  | 4.7%  | 0.0%  |
| <b>Stroke</b>                               | 2.5%                          | 6.5%  | 5.7%  | 12.8% | 9.6%  | 10.4% |
| <b>Venous stroke</b>                        | 7.7%                          | 17.8% | 11.3% | 9.1%  | 15.4% | 12.5% |
| <b>Nervous system hemorrhage</b>            | 20.3%                         | 36.1% | 28.6% | 48.7% | 34.1% | 24.1% |
| <b>Cranial nerves</b>                       | 0.0%                          | 0.2%  | 0.0%  | 0.0%  | 0.0%  | 0.0%  |
